# Supplementary material for: DNA Polyelectrolyte Multilayer Coatings Are Antifouling and Promote Mammalian Cell Adhesion
Source: MDPI journal article supplement (doi:10.3390/ma14164596), 2021-08-16
Supplement: s1 [file s1]

Supplementary Materials

# DNA Polyelectrolyte Multilayer Coatings Are Antifouling and Promote Mammalian Cell Adhesion

Omar Abdelaziz Ouni, Guruprakash Subbiahdoss \*, Andrea Scheberl and Erik Reimhult

Department of Nanobiotechnology, Institute of Biologically Inspired Materials,  
University of Natural Resources and Life Sciences (BOKU), 1190, Vienna, Austria;  
omarabdellazizouni@gmail.com (O.A.O.); andrea.scheberl@boku.ac.at (A.S.); erik.reimhult@boku.ac.at (E.R.)

\* Correspondence: [guruprakash.subbiahdoss@boku.ac.at](mailto:guruprakash.subbiahdoss@boku.ac.at) (G.S.); Tel.: +43-(1)-47654 (ext. 80205)

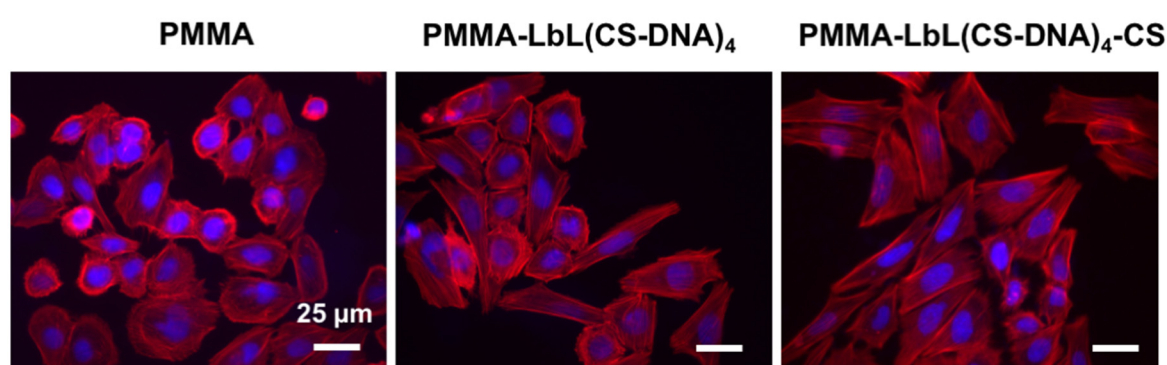

**Figure S1.** Fluorescence microscopic images of SaOS-2 cells after 48 h growth on PMMA, PMMA-LbL(CS-DNA)<sub>4</sub>, and PMMA-LbL(CS-DNA)<sub>4</sub>-CS surfaces. PMMA-LbL(CS-DNA)<sub>4</sub> are terminated with a DNA top layer and PMMA-LbL(CS-DNA)<sub>4</sub>-CS are terminated with a CS top layer. SaOS-2 cells were stained with PBS containing DAPI and TRITC-phalloidin. The scale bars denote 25 μm.

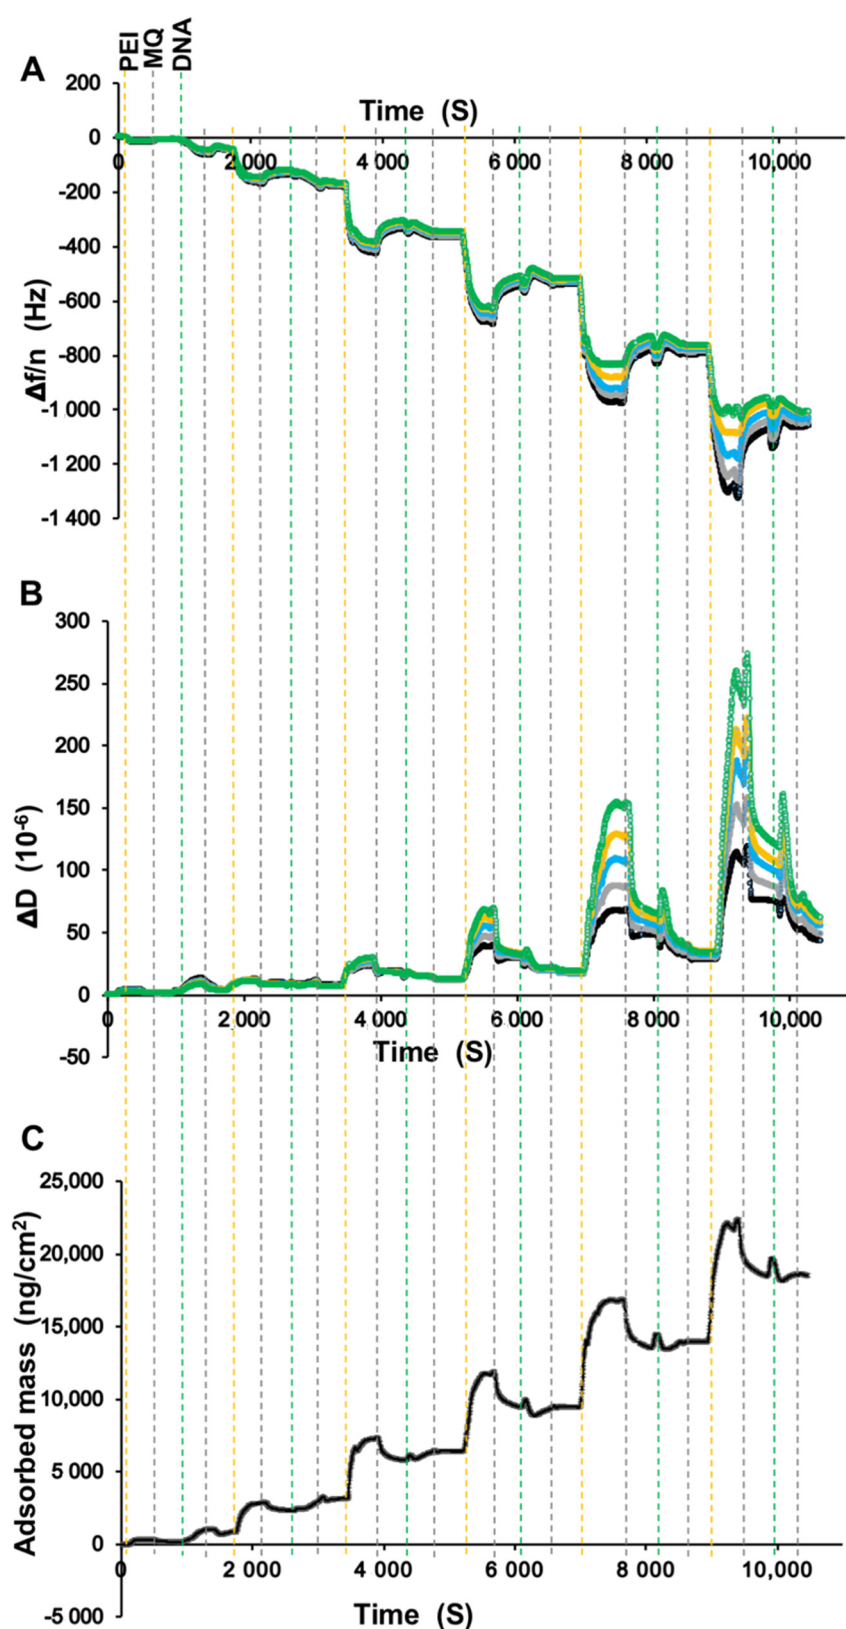

**Figure S2.** (A) QCM-D data showing the evolution of the frequency shift,  $\Delta f/n$ , and (B) dissipation  $\Delta D$  during the film build-up for the overtones  $n = 3, 5, 7, 9$ , and  $11$ . The  $\Delta f/n$  decrease observed after each successive layer of polyelectrolytes PEI (yellow dashed lines) and DNA (green) shows a representative example of the film build-up. The  $\Delta f/n$  increase observed after injection of Milli-Q water (grey dashed lines) indicates the removal of weakly adsorbed excess polymer. The  $\Delta D$  increased rapidly in tandem with the decrease in  $\Delta f/n$  during layer adsorption. The increase in  $\Delta D$  was reversed during

rinsing, removing loosely bound polymer. C) The adsorbed mass of the film calculated according to the Sauerbrey equation as a function of time.

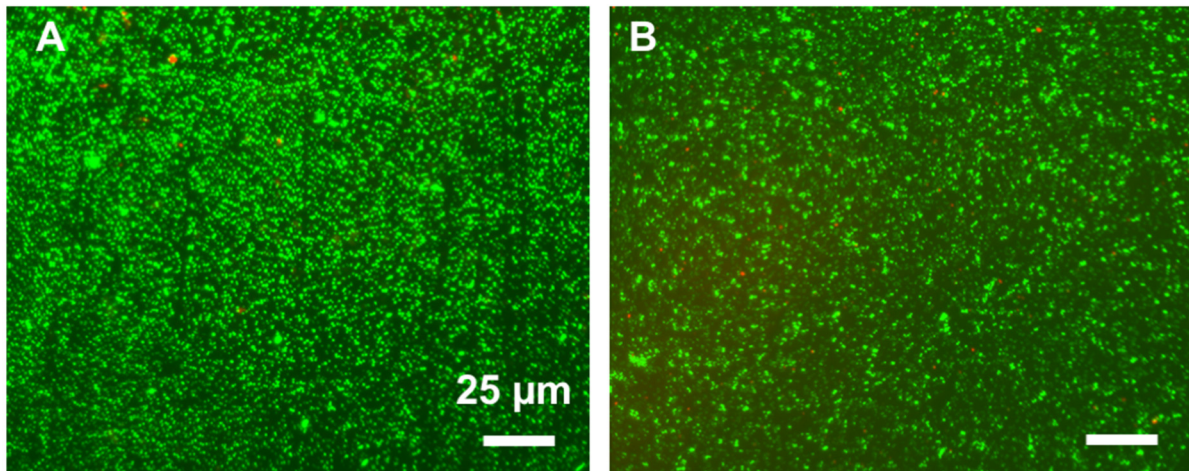

**Figure S3.** Representative fluorescence microscope images of adherent *S. aureus* ATCC 12598 on (A) PMMA and (B) PMMA-LbL(PEI-PSS)3-CS surfaces after incubation at 37 °C for 24 h. Bacteria were stained using vitality staining solution (3.34 mM SYTO 9 and 20 mM propidium iodide in PBS) and incubated for 15 min in the dark at room temperature. The scale bar denotes 25 μm.
